# Supplementary material for: For Whom Does a Brief Mindfulness Induction Work? An exploration of the moderating role of individual differences in the effect of mindfulness induction on executive functioning and mind-wandering
Source: Research Square preprint supplement (doi:10.21203/rs.3.rs-7100595/v1), 2025-07-23
Supplement: Supplementary file 1 [file eb1d70bb1cfd4b31180c1897.docx]

**Supplementary File**

**Title:** For Whom Does a Brief Mindfulness Induction Work? An exploration of the moderating role of individual differences in the effect of mindfulness induction on executive functioning and mind-wandering

**Authors:** Anonymized for peer review

Part 1: Table S2-S8 shows non-significant moderation effects

Part 2: The Cognitive tasks used in this study.

| **Part 1**  Note: Table S2-S8 are based on the PROCESS macro package in R.  Table S1: *Working memory (d’) predicted from mindfulness condition and individual differences* | | | | | | | | | |
| --- | --- | --- | --- | --- | --- | --- | --- | --- | --- |
| Model | DR2 | | B | *t* | *p* | BootMean | BootSE | BootLLCI 95% | BootULCI 95% | |
|  | 0.02 | |  |  |  |  |  |  |  | |
| Group |  | | 0.02 | 0.12 | 0.91 | 0.03 | 0.16 | -0.28 | 0.33 | |
| Age |  | | 0.03 | 1.15 | 0.25 | 0.03 | 0.02 | -0.02 | 0.07 | |
| Group * Age |  | | -0.05 | -1.6 | 0.11 | -0.05 | 0.03 | -0.1 | 0.01 | |
|  | 0.003 | |  |  |  |  |  |  |  | |
| Group |  | | 0.02 | 0.15 | 0.88 | 0.02 | 0.16 | -0.29 | 0.34 | |
| Gender |  | | -0.06 | -0.24 | 0.81 | -0.07 | 0.23 | -0.55 | 0.37 | |
| Group * Gender |  | | 0.23 | 0.67 | 0.50 | 0.22 | 0.33 | -0.47 | 0.84 | |
|  | 0.02 | |  |  |  |  |  |  |  | |
| Group |  | | -0.67 | -1.37 | 0.17 | -0.66 | 0.48 | -1.58 | 0.30 | |
| Previous mindfulness meditation experience |  | | -0.28 | -1.07 | 0.29 | -0.27 | 0.22 | -0.70 | 0.17 | |
| Group * Previous mindfulness meditation experience |  | | 0.50 | 1.50 | 0.14 | 0.50 | 0.32 | -0.12 | 1.10 | |
|  | 0.02 | |  |  |  |  |  |  |  | |
| Group |  | | 0.02 | 0.14 | 0.89 | 0.03 | 0.16 | -0.28 | 0.34 | |
| Observation |  | | 0.03 | 0.59 | 0.55 | 0.03 | 0.05 | -0.06 | 0.12 | |
| Group * Observation |  | | -0.12 | -1.68 | 0.10 | -0.13 | 0.07 | -0.26 | 0.004 | |
|  | 0.03 | |  |  |  |  |  |  |  | |
| Group |  | | 0.01 | 0.07 | 0.94 | 0.01 | 0.16 | -0.29 | 0.32 | |
| Description |  | | 0.06 | 1.39 | 0.17 | 0.06 | 0.04 | -0.01 | 0.14 | |
| Group * Description | |  | -0.13 | -2.02 | 0.045 | -0.13 | 0.05 | -0.23 | -0.03 | |
|  | | 0.008 |  |  |  |  |  |  |  | |
| Group | |  | 0.02 | 0.14 | 0.89 | 0.02 | 0.16 | -0.29 | 0.33 | |
| Acting with Awareness | |  | 0.03 | 0.66 | 0.51 | 0.04 | 0.05 | -0.06 | 0.13 | |
| Group * Acting with Awareness | |  | -0.07 | 0.07 | 0.29 | -0.08 | 0.07 | -0.21 | 0.06 | |
|  | | 0.0005 |  |  |  |  |  |  |  | |
| Group | |  | -0.01 | -0.06 | 0.96 | -0.01 | 0.16 | -0.33 | 0.31 | |
| Non-judgemental | |  | 0.02 | 0.41 | 0.68 | 0.02 | 0.05 | -0.09 | 0.13 | |
| Group * Non-judgemental | |  | 0.02 | 0.25 | 0.80 | 0.02 | 0.07 | -0.11 | 0.15 | |
|  | | 0.0003 |  |  |  |  |  |  |  | |
| Group | |  | 0.03 | 0.15 | 0.88 | 0.03 | 0.16 | -0.29 | 0.35 | |
| Non-reactivity | |  | 0.01 | 0.16 | 0.87 | 0.01 | 0.07 | -0.11 | 0.15 | |
| Group * Non-reactivity | |  | 0.01 | 0.20 | 0.84 | 0.01 | 0.08 | -0.16 | 0.17 | |
|  | | 0.02 |  |  |  |  |  |  |  | |
| Group | |  | 0.001 | 0.01 | 0.99 | 0.002 | 0.15 | -0.29 | 0.30 | |
| Trait mindfulness total | |  | 0.03 | 1.31 | 0.19 | 0.03 | 0.02 | -0.02 | 0.07 | |
| Group * Trait mindfulness total | |  | -0.04 | -1.50 | 0.14 | -0.04 | 0.03 | -0.09 | 0.02 | |
|  | | 0.001 |  |  |  |  |  |  |  | |
| Group | |  | 0.001 | 0.01 | 0.99 | 0.01 | 0.16 | -0.30 | 0.31 | |
| Extraversion | |  | -0.04 | -1.24 | 0.22 | -0.04 | 0.03 | -0.11 | 0.02 | |
| Group * Extraversion | |  | -0.02 | -0.43 | 0.66 | -0.02 | 0.04 | -0.10 | 0.07 | |
|  | | 0.0005 |  |  |  |  |  |  |  | |
| Group | |  | 0.03 | 0.17 | 0.86 | 0.03 | 0.16 | -0.27 | 0.34 | |
| Agreeableness | |  | -0.04 | -1.00 | 0.32 | -0.04 | 0.04 | -0.11 | 0.04 | |
| Group * Agreeableness | |  | 0.02 | 0.27 | 0.78 | 0.02 | 0.06 | -0.11 | 0.13 | |
|  | | 0.003 |  |  |  |  |  |  |  | |
| Group | |  | 0.02 | 0.15 | 0.88 | 0.03 | 0.16 | -0.28 | 0.35 | |
| Conscientiousness | |  | 0.02 | 0.69 | 0.50 | 0.02 | 0.03 | -0.04 | 0.10 | |
| Group * Conscientiousness | |  | -0.03 | -0.66 | 0.51 | -0.03 | 0.05 | -0.13 | 0.06 | |
|  | | 0.001 |  |  |  |  |  |  |  | |
| Group | |  | 0.003 | 0.02 | 0.98 | 0.01 | 0.16 | -0.30 | 0.31 | |
| Neuroticism | |  | -0.01 | -0.26 | 0.79 | -0.01 | 0.04 | -0.10 | 0.07 | |
| Group * Neuroticism | |  | -0.02 | -0.36 | 0.72 | -0.02 | 0.05 | -0.12 | 0.09 | |
|  | | 0.02 |  |  |  |  |  |  |  | |
| Group | |  | 0.02 | 0.14 | 0.89 | 0.03 | 0.16 | -0.28 | 0.33 | |
| Imagination | |  | 0.05 | 1.27 | 0.21 | 0.06 | 0.05 | -0.02 | 0.16 | |
| Group * Imagination | |  | -0.1 | -1.84 | 0.07 | -0.11 | 0.06 | -0.22 | -0.002 | |
|  | | 0.00 |  |  |  |  |  |  |  | |
| Group | |  | 0.02 | 0.14 | 0.89 | 0.03 | 0.16 | -0.28 | 0.34 | |
| Mindfulness mindset | |  | -0.02 | -0.90 | 0.37 | -0.02 | 0.02 | -0.05 | 0.02 | |
| Group * Mindfulness mindset | |  | 0.002 | 0.06 | 0.95 | 0.001 | 0.03 | -0.05 | 0.06 | |
|  | | 0.01 |  |  |  |  |  |  |  | |
| Group | |  | 0.004 | 0.03 | 0.98 | 0.001 | 0.15 | -0.30 | 0.30 | |
| Trait mind-wandering | |  | -0.04 | -1.48 | 0.14 | -0.04 | 0.03 | -0.11 | 0.02 | |
| Group * Trait mind-wandering | |  | 00.05 | 1.24 | 0.22 | 0.05 | 0.04 | -0.02 | 0.12 | |
|  | | 0.01 |  |  |  |  |  |  |  | |
| Group | |  | 0.02 | 0.12 | 0.91 | 0.02 | 0.16 | -0.28 | 0.33 | |
| Positive affect | |  | 0.02 | 0.60 | 0.56 | 0.02 | 0.03 | -0.03 | 0.08 | |
| Group * Positive affect | |  | -0.04 | -0.85 | 0.40 | -0.04 | 0.04 | -0.12 | 0.04 | |
|  | | 0.004 |  |  |  |  |  |  |  | |
| Group | |  | 0.03 | 0.19 | 0.85 | 0.04 | 0.16 | -0.27 | 0.36 | |
| Negative affect | |  | 0.0001 | 0.002 | 0.999 | -0.01 | 0.04 | -0.11 | 0.06 | |
| Group * Negative affect | |  | -0.04 | -0.74 | 0.46 | -0.03 | 0.05 | -0.13 | 0.10 | |
|  | | 0.0002 |  |  |  |  |  |  |  | |
| Group | |  | 51.00 | 1.79 | 0.08 | 50.47 | 27.83 | -3.79 | 105.42 | |
| Trai anxiety | |  | 1.52 | 0.64 | 0.53 | 1.55 | 1.71 | -1.80 | 4.97 | |
| Group * Trait anxiety | |  | -0.50 | -0.17 | 0.87 | -0.47 | 2.67 | -5.69 | 4.85 | |

Part 1

Note: Table S2-8 are based on the PROCESS macro package in R.

| Table S2: *Working memory (d’) predicted from mindfulness condition and individual differences* | | | | | | | | |
| --- | --- | --- | --- | --- | --- | --- | --- | --- |
| Model | DR2 | B | *t* | *p* | BootMean | BootSE | BootLLCI 95% | BootULCI 95% | |
|  | 0.02 |  |  |  |  |  |  |  | |
| Group |  | 0.02 | 0.12 | 0.91 | 0.03 | 0.16 | -0.28 | 0.33 | |
| Age |  | 0.03 | 1.15 | 0.25 | 0.03 | 0.02 | -0.02 | 0.07 | |
| Group * Age |  | -0.05 | -1.6 | 0.11 | -0.05 | 0.03 | -0.1 | 0.01 | |
|  | 0.003 |  |  |  |  |  |  |  | |
| Group |  | 0.02 | 0.15 | 0.88 | 0.02 | 0.16 | -0.29 | 0.34 | |
| Gender |  | -0.06 | -0.24 | 0.81 | -0.07 | 0.23 | -0.55 | 0.37 | |
| Group * Gender |  | 0.23 | 0.67 | 0.50 | 0.22 | 0.33 | -0.47 | 0.84 | |
|  | 0.02 |  |  |  |  |  |  |  | |
| Group |  | -0.67 | -1.37 | 0.17 | -0.66 | 0.48 | -1.58 | 0.30 | |
| Previous mindfulness meditation experience |  | -0.28 | -1.07 | 0.29 | -0.27 | 0.22 | -0.70 | 0.17 | |
| Group * Previous mindfulness meditation experience |  | 0.50 | 1.50 | 0.14 | 0.50 | 0.32 | -0.12 | 1.10 | |
|  | 0.02 |  |  |  |  |  |  |  | |
| Group |  | 0.02 | 0.14 | 0.89 | 0.03 | 0.16 | -0.28 | 0.34 | |
| Observation |  | 0.03 | 0.59 | 0.55 | 0.03 | 0.05 | -0.06 | 0.12 | |
| Group * Observation |  | -0.12 | -1.68 | 0.10 | -0.13 | 0.07 | -0.26 | 0.004 | |
|  | 0.03 |  |  |  |  |  |  |  | |
| Group |  | 0.01 | 0.07 | 0.94 | 0.01 | 0.16 | -0.29 | 0.32 | |
| Description |  | 0.06 | 1.39 | 0.17 | 0.06 | 0.04 | -0.01 | 0.14 | |
| Group * Description |  | -0.13 | -2.02 | 0.045 | -0.13 | 0.05 | -0.23 | -0.03 | |
|  | 0.008 |  |  |  |  |  |  |  | |
| Group |  | 0.02 | 0.14 | 0.89 | 0.02 | 0.16 | -0.29 | 0.33 | |
| Acting with Awareness |  | 0.03 | 0.66 | 0.51 | 0.04 | 0.05 | -0.06 | 0.13 | |
| Group * Acting with Awareness |  | -0.07 | 0.07 | 0.29 | -0.08 | 0.07 | -0.21 | 0.06 | |
|  | 0.0005 |  |  |  |  |  |  |  | |
| Group |  | -0.01 | -0.06 | 0.96 | -0.01 | 0.16 | -0.33 | 0.31 | |
| Non-judgemental |  | 0.02 | 0.41 | 0.68 | 0.02 | 0.05 | -0.09 | 0.13 | |
| Group * Non-judgemental |  | 0.02 | 0.25 | 0.80 | 0.02 | 0.07 | -0.11 | 0.15 | |
|  | 0.0003 |  |  |  |  |  |  |  | |
| Group |  | 0.03 | 0.15 | 0.88 | 0.03 | 0.16 | -0.29 | 0.35 | |
| Non-reactivity |  | 0.01 | 0.16 | 0.87 | 0.01 | 0.07 | -0.11 | 0.15 | |
| Group * Non-reactivity |  | 0.01 | 0.20 | 0.84 | 0.01 | 0.08 | -0.16 | 0.17 | |
|  | 0.02 |  |  |  |  |  |  |  | |
| Group |  | 0.001 | 0.01 | 0.99 | 0.002 | 0.15 | -0.29 | 0.30 | |
| Trait mindfulness total |  | 0.03 | 1.31 | 0.19 | 0.03 | 0.02 | -0.02 | 0.07 | |
| Group * Trait mindfulness total |  | -0.04 | -1.50 | 0.14 | -0.04 | 0.03 | -0.09 | 0.02 | |
|  | 0.001 |  |  |  |  |  |  |  | |
| Group |  | 0.001 | 0.01 | 0.99 | 0.01 | 0.16 | -0.30 | 0.31 | |
| Extraversion |  | -0.04 | -1.24 | 0.22 | -0.04 | 0.03 | -0.11 | 0.02 | |
| Group * Extraversion |  | -0.02 | -0.43 | 0.66 | -0.02 | 0.04 | -0.10 | 0.07 | |
|  | 0.0005 |  |  |  |  |  |  |  | |
| Group |  | 0.03 | 0.17 | 0.86 | 0.03 | 0.16 | -0.27 | 0.34 | |
| Agreeableness |  | -0.04 | -1.00 | 0.32 | -0.04 | 0.04 | -0.11 | 0.04 | |
| Group * Agreeableness |  | 0.02 | 0.27 | 0.78 | 0.02 | 0.06 | -0.11 | 0.13 | |
|  | 0.003 |  |  |  |  |  |  |  | |
| Group |  | 0.02 | 0.15 | 0.88 | 0.03 | 0.16 | -0.28 | 0.35 | |
| Conscientiousness |  | 0.02 | 0.69 | 0.50 | 0.02 | 0.03 | -0.04 | 0.10 | |
| Group * Conscientiousness |  | -0.03 | -0.66 | 0.51 | -0.03 | 0.05 | -0.13 | 0.06 | |
|  | 0.001 |  |  |  |  |  |  |  | |
| Group |  | 0.003 | 0.02 | 0.98 | 0.01 | 0.16 | -0.30 | 0.31 | |
| Neuroticism |  | -0.01 | -0.26 | 0.79 | -0.01 | 0.04 | -0.10 | 0.07 | |
| Group * Neuroticism |  | -0.02 | -0.36 | 0.72 | -0.02 | 0.05 | -0.12 | 0.09 | |
|  | 0.02 |  |  |  |  |  |  |  | |
| Group |  | 0.02 | 0.14 | 0.89 | 0.03 | 0.16 | -0.28 | 0.33 | |
| Imagination |  | 0.05 | 1.27 | 0.21 | 0.06 | 0.05 | -0.02 | 0.16 | |
| Group * Imagination |  | -0.1 | -1.84 | 0.07 | -0.11 | 0.06 | -0.22 | -0.002 | |
|  | 0.00 |  |  |  |  |  |  |  | |
| Group |  | 0.02 | 0.14 | 0.89 | 0.03 | 0.16 | -0.28 | 0.34 | |
| Mindfulness mindset |  | -0.02 | -0.90 | 0.37 | -0.02 | 0.02 | -0.05 | 0.02 | |
| Group * Mindfulness mindset |  | 0.002 | 0.06 | 0.95 | 0.001 | 0.03 | -0.05 | 0.06 | |
|  | 0.01 |  |  |  |  |  |  |  | |
| Group |  | 0.004 | 0.03 | 0.98 | 0.001 | 0.15 | -0.30 | 0.30 | |
| Trait mind-wandering |  | -0.04 | -1.48 | 0.14 | -0.04 | 0.03 | -0.11 | 0.02 | |
| Group * Trait mind-wandering |  | 00.05 | 1.24 | 0.22 | 0.05 | 0.04 | -0.02 | 0.12 | |
|  | 0.01 |  |  |  |  |  |  |  | |
| Group |  | 0.02 | 0.12 | 0.91 | 0.02 | 0.16 | -0.28 | 0.33 | |
| Positive affect |  | 0.02 | 0.60 | 0.56 | 0.02 | 0.03 | -0.03 | 0.08 | |
| Group * Positive affect |  | -0.04 | -0.85 | 0.40 | -0.04 | 0.04 | -0.12 | 0.04 | |
|  | 0.004 |  |  |  |  |  |  |  | |
| Group |  | 0.03 | 0.19 | 0.85 | 0.04 | 0.16 | -0.27 | 0.36 | |
| Negative affect |  | 0.0001 | 0.002 | 0.999 | -0.01 | 0.04 | -0.11 | 0.06 | |
| Group * Negative affect |  | -0.04 | -0.74 | 0.46 | -0.03 | 0.05 | -0.13 | 0.10 | |
|  | 0.0002 |  |  |  |  |  |  |  | |
| Group |  | 51.00 | 1.79 | 0.08 | 50.47 | 27.83 | -3.79 | 105.42 | |
| Trai anxiety |  | 1.52 | 0.64 | 0.53 | 1.55 | 1.71 | -1.80 | 4.97 | |
| Group * Trait anxiety |  | -0.50 | -0.17 | 0.87 | -0.47 | 2.67 | -5.69 | 4.85 | |

| Table S2: *Working memory (RT) predicted from mindfulness condition and Individual differences* | | | | | | | | | |
| --- | --- | --- | --- | --- | --- | --- | --- | --- | --- |
| Model | DR2 | | B | *t* | *p* | BootMean | BootSE | BootLLCI 95% | BootULCI 95% | |
|  | 0.003 | |  |  |  |  |  |  |  | |
| Group |  | | 47.96 | 1.69 | 0.09 | 48.04 | 27.29 | -4.72 | 102.55 | |
| Age |  | | 3.01 | 0.68 | 0.50 | 2.82 | 3.21 | -4.27 | 8.47 | |
| Group * Age |  | | -3.52 | -0.63 | 0.53 | -4.13 | 4.64 | -13.70 | 4.79 | |
|  | 0.0003 | |  |  |  |  |  |  |  | |
| Group |  | | 47.28 | 1.66 | 0.10 | 47.36 | 2.10 | -5.27 | 100.17 | |
| Gender |  | | -16.80 | -0.36 | 0.72 | -13.11 | 47.19 | -94.12 | 92.18 | |
| Group * Gender |  | | -12.01 | -0.20 | 0.84 | -15.71 | 58.13 | -138.30 | 90.58 | |
|  | 0.001 | |  |  |  |  |  |  |  | |
| Group |  | | 13.23 | 0.16 | 0.88 | 14.04 | 82.77 | -146.37 | 179.12 | |
| Previous mindfulness meditation experience |  | | 3.16 | 0.07 | 0.94 | 3.58 | 37.74 | -69.33 | 78.50 | |
| Group * Previous mindfulness meditation experience |  | | 25.90 | 0.44 | 0.66 | 25.51 | 54.02 | -82.16 | 129.41 | |
|  | 0.001 | |  |  |  |  |  |  |  | |
| Group |  | | 49.16 | 1.75 | 0.08 | 49.68 | 26.92 | -2.53 | 102.76 | |
| Observation |  | | -14.82 | -1.62 | 0.11 | -14.71 | 7.94 | -30.32 | 1.02 | |
| Group * Observation |  | | 5.69 | 0.44 | 0.66 | 5.68 | 12.97 | -20.30 | 30.46 | |
|  | 0.01 | |  |  |  |  |  |  |  | |
| Group |  | | 54.65 | 1.91 | 0.06 | 55.39 | 27.97 | 0.73 | 110.76 | |
| Description |  | | -0.41 | -0.05 | 0.96 | -0.46 | 6.62 | -13.30 | 12.68 | |
| Group * Description | |  | -14.21 | -1.28 | 0.20 | -14.43 | 9.74 | -34.35 | 3.88 | |
|  | | 0.01 |  |  |  |  |  |  |  | |
| Group | |  | 48.62 | 1.73 | 48.19 | 48.19 | 27.12 | -5.24 | 101.09 | |
| Acting with Awareness | |  | 4.11 | 0.45 | 4.31 | 4.31 | 6.80 | -8.31 | 18.53 | |
| Group * Acting with Awareness | |  | -17.69 | -1.46 | -17.86 | -17.86 | 11.63 | -41.48 | 4.10 | |
|  | | 0.005 |  |  |  |  |  |  |  | |
| Group | |  | 63.67 | 2.22 | 0.03 | 63.38 | 27.90 | 9.19 | 118.96 | |
| Non-judgemental | |  | -17.25 | -1.93 | 0.06 | -17.41 | 6.78 | -31.12 | -4.28 | |
| Group * Non-judgemental | |  | 9.07 | 0.82 | 0.41 | 9.11 | 10.56 | -11.80 | 29.84 | |
|  | | 0.00 |  |  |  |  |  |  |  | |
| Group | |  | 47.12 | 1.66 | 0.10 | 46.87 | 27.21 | -5.97 | 100.05 | |
| Non-reactivity | |  | -7.22 | -0.73 | 0.47 | -7.51 | 8.03 | -24.89 | 6.97 | |
| Group * Non-reactivity | |  | 1.02 | 0.08 | 0.94 | 0.61 | 12.46 | -24.34 | 25.08 | |
|  | | 0.001 |  |  |  |  |  |  |  | |
| Group | |  | 60.11 | 2.15 | 0.03 | 59.84 | 27.01 | 7.15 | 112.41 | |
| Trait mindfulness total | |  | -5.24 | -1.51 | 0.13 | -5.27 | 2.71 | -10.82 | -0.12 | |
| Group * Trait mindfulness total | |  | -1.50 | -0.34 | 0.74 | -1.58 | 4.61 | -10.73 | 7.34 | |
|  | | 0.004 |  |  |  |  |  |  |  | |
| Group | |  | 47.72 | 1.68 | 0.10 | 47.13 | 27.42 | -6.18 | 101.53 | |
| Extraversion | |  | -4.53 | -0.76 | 0.45 | -4.64 | 4.64 | -14.22 | 4.29 | |
| Group * Extraversion | |  | 6.29 | 0.78 | 0.43 | 6.41 | 6.92 | -7.40 | 20.18 | |
|  | | 0.003 |  |  |  |  |  |  |  | |
| Group | |  | 49.03 | 1.73 | 0.09 | 48.53 | 27.41 | -4.48 | 102.26 | |
| Agreeableness | |  | -0.01 | -0.001 | 0.9994 | -0.87 | 5.56 | -13.58 | 8.04 | |
| Group * Agreeableness | |  | -7.22 | -0.69 | 0.49 | -6.84 | 10.59 | -27.90 | 13.98 | |
|  | | 0.007 |  |  |  |  |  |  |  | |
| Group | |  | 46.97 | 1.67 | 0.10 | 46.58 | 27.27 | -6.05 | 100.57 | |
| Conscientiousness | |  | -2.01 | -0.35 | 0.73 | -2.19 | 3.73 | -9.98 | 4.61 | |
| Group * Conscientiousness | |  | -8.21 | -1.02 | 0.31 | -7.89 | 6.76 | -21.40 | 5.45 | |
|  | | 0.007 |  |  |  |  |  |  |  | |
| Group | |  | 50.67 | 1.77 | 0.08 | 49.98 | 27.38 | -3.71 | 104.09 | |
| Neuroticism | |  | 5.89 | 0.80 | 0.42 | 6.07 | 5.65 | -4.59 | 17.64 | |
| Group * Neuroticism | |  | -8.79 | -0.98 | 0.33 | -8.85 | 7.68 | -23.89 | 6.15 | |
|  | | 0.00 |  |  |  |  |  |  |  | |
| Group | |  | 48.18 | 1.70 | 0.09 | 48.80 | 27.23 | -4.11 | 102.34 | |
| Imagination | |  | -5.04 | -0.70 | 0.48 | -4.65 | 6.69 | -17.30 | 9.22 | |
| Group * Imagination | |  | -0.14 | -0.01 | 0.99 | -0.60 | 9.41 | -19.21 | 17.77 | |
|  | | 0.003 |  |  |  |  |  |  |  | |
| Group | |  | 48.19 | 1.72 | 0.09 | - 49.15 | 26.72 | -3.16 | 102.40 | |
| Mindfulness mindset | |  | 6.29 | 1.89 | 0.06 | 6.16 | 3.20 | -0.31 | 12.37 | |
| Group * Mindfulness mindset | |  | -2.88 | -0.64 | 0.52 | -2.71 | 4.53 | -11.67 | 6.14 | |
|  | | 0.003 |  |  |  |  |  |  |  | |
| Group | |  | 49.34 | 1.73 | 0.09 | 48.87 | 27.75 | -5.36 | 103.25 | |
| Trait mind-wandering | |  | -0.48 | -0.09 | 0.93 | -0.66 | 3.76 | -8.40 | 6.57 | |
| Group * Trait mind-wandering | |  | 3.93 | 0.60 | 0.55 | 4.31 | 5.95 | -6.73 | 16.42 | |
|  | | 0.001 |  |  |  |  |  |  |  | |
| Group | |  | 50.37 | 1.77 | 0.08 | 50.60 | 26.89 | -1.85 | 103.87 | |
| Positive affect | |  | -4.30 | -0.74 | 0.46 | -4.30 | 5.05 | -14.43 | 5.52 | |
| Group * Positive affect | |  | 3.34 | 0.43 | 0.67 | 3.34 | 6.89 | -10.06 | 16.98 | |
|  | | 0.001 |  |  |  |  |  |  |  | |
| Group | |  | 45.17 | 1.60 | 0.11 | 44.55 | 26.74 | -7.76 | 97.68 | |
| Negative affect | |  | 4.26 | 0.59 | 0.56 | 4.85 | 5.67 | -5.30 | 17.97 | |
| Group * Negative affect | |  | 3.66 | 0.41 | 0.68 | 3.04 | 8.99 | -15.57 | 20.42 | |
|  | | 0.0002 |  |  |  |  |  |  |  | |
| Group | |  | 51.01 | 1.79 | 0.08 | 50.47 | 27.83 | -3.79 | 105.42 | |
| Trai anxiety | |  | 1.52 | 0.64 | 0.53 | 1.55 | 1.71 | -1.80 | 4.97 | |
| Group * Trait anxiety | |  | -0.50 | -0.17 | 0.87 | -0.47 | 2.67 | -5.69 | 4.85 | |

| Table S3: *Working memory (accuracy) predicted from mindfulness condition and Individual differences* | | | | | | | | | |
| --- | --- | --- | --- | --- | --- | --- | --- | --- | --- |
| Model | DR2 | | B | *t* | *p* | BootMean | BootSE | BootLLCI 95% | BootULCI 95% | |
|  | 0.01 | |  |  |  |  |  |  |  | |
| Group |  | | 0.01 | 0.40 | 0.69 | 0.01 | 0.01 | -0.02 | 0.04 | |
| Age |  | | 0.002 | 1.06 | 0.30 | 0.002 | 0.002 | -0.002 | 0.01 | |
| Group * Age |  | | -0.004 | -1.25 | 0.21 | -0.003 | 0.003 | -0.01 | 0.002 | |
|  | 0.0002 | |  |  |  |  |  |  |  | |
| Group |  | | 0.01 | 0.44 | 0.66 | 0.01 | 0.02 | -0.02 | 0.04 | |
| Gender |  | | 0.003 | 0.11 | 0.91 | 0.002 | 0.02 | -0.04 | 0.04 | |
| Group * Gender |  | | 0.005 | 0.16 | 0.87 | 0.003 | 0.03 | -0.06 | 0.06 | |
|  | 0.0002 | |  |  |  |  |  |  |  | |
| Group |  | | 0.01 | 0.44 | 0.66 | 0.01 | 0.02 | -0.02 | 0.04 | |
| Previous mindfulness meditation experience |  | | 0.003 | 0.11 | 0.91 | 0.002 | 0.02 | -0.04 | 0.04 | |
| Group * Previous mindfulness meditation experience |  | | 0.005 | 0.16 | 0.87 | 0.003 | 0.03 | -0.06 | 0.06 | |
|  | 0.02 | |  |  |  |  |  |  |  | |
| Group |  | | 0.01 | 0.43 | 0.67 | 0.01 | 0.01 | -0.02 | 0.04 | |
| Observation |  | | 0.04 | 0.77 | 0.44 | 0.004 | 0.004 | -0.004 | 0.01 | |
| Group * Observation |  | | -0.01 | -1.68 | 0.10 | -0.01 | 0.006 | -0.02 | -0.0002 | |
|  | 0.03 | |  |  |  |  |  |  |  | |
| Group |  | | 0.006 | 0.43 | 0.67 | 0.01 | 0.01 | -0.02 | 0.03 | |
| Description |  | | 0.005 | 1.11 | 0.27 | 0.005 | 0.003 | -0.002 | 0.01 | |
| Group * Description | |  | -0.01 | -1.99 | 0.05 | -0.01 | 0.005 | -0.02 | -0.003 | |
|  | | 0.005 |  |  |  |  |  |  |  | |
| Group | |  | 0.01 | 0.42 | 0.67 | 0.01 | 0.01 | -0.02 | 0.04 | |
| Acting with Awareness | |  | 0.002 | 0.37 | 0.71 | 0.002 | 0.005 | -0.007 | 0.01 | |
| Group * Acting with Awareness | |  | -0.005 | -0.80 | 0.43 | -0.005 | 0.006 | -0.18 | 0.01 | |
|  | | 0.0001 |  |  |  |  |  |  |  | |
| Group | |  | 0.003 | 0.18 | 0.86 | 0.003 | 0.01 | -0.03 | 0.03 | |
| Non-judgemental | |  | 0.004 | 0.74 | 0.46 | 0.003 | 0.01 | -0.01 | 0.01 | |
| Group * Non-judgemental | |  | -0.0008 | -0.13 | 0.89 | -0.0007 | 0.01 | -0.01 | 0.01 | |
|  | | 0.001 |  |  |  |  |  |  |  | |
| Group | |  | 0.01 | 0.47 | 0.64 | 0.01 | 0.02 | -0.02 | 0.04 | |
| Non-reactivity | |  | 0.004 | 0.80 | 0.43 | 0.004 | 0.01 | -0.007 | 0.02 | |
| Group * Non-reactivity | |  | -0.003 | -0.41 | 0.68 | -0.003 | 0.01 | -0.02 | 0.01 | |
|  | | 0.02 |  |  |  |  |  |  |  | |
| Group | |  | 0.004 | 0.28 | 0.78 | 0.004 | 0.01 | -0.02 | 0.03 | |
| Trait mindfulness total | |  | 0.003 | 1.51 | 0.13 | 0.003 | 0.002 | -0.001 | 0.01 | |
| Group * Trait mindfulness total | |  | -0.004 | -1.75 | 0.08 | -0.004 | 0.003 | -0.01 | 0.0007 | |
|  | | 0.003 |  |  |  |  |  |  |  | |
| Group | |  | 0.004 | 0.30 | 0.76 | 0.004 | 0.01 | -0.02 | 0.03 | |
| Extraversion | |  | -0.004 | -1.15 | 0.25 | -0.004 | 0.003 | -0.01 | 0.002 | |
| Group * Extraversion | |  | -0.003 | -0.64 | 0.52 | -0.003 | 0.004 | -0.01 | 0.01 | |
|  | | 0.0002 |  |  |  |  |  |  |  | |
| Group | |  | 0.01 | 0.47 | 0.64 | 0.01 | 0.01 | -0.02 | 0.04 | |
| Agreeableness | |  | -0.004 | -1.16 | 0.25 | -0.004 | 0.004 | -0.01 | 0.003 | |
| Group * Agreeableness | |  | 0.001 | 0.18 | 0.86 | 0.001 | 0.01 | -0.01 | 0.01 | |
|  | | 0.0005 |  |  |  |  |  |  |  | |
| Group | |  | 0.01 | 0.47 | 0.64 | 0.01 | 0.01 | -0.02 | 0.04 | |
| Conscientiousness | |  | 0.003 | 0.97 | 0.33 | 0.003 | 0.003 | -0.002 | 0.01 | |
| Group * Conscientiousness | |  | -0.001 | -0.26 | 0.79 | -0.001 | 0.005 | -0.01 | 0.01 | |
|  | | 0.0003 |  |  |  |  |  |  |  | |
| Group | |  | 0.003 | 0.24 | 0.81 | 0.004 | 0.01 | -0.02 | 0.03 | |
| Neuroticism | |  | -0.003 | -0.82 | 0.41 | -0.003 | 0.004 | -0.01 | 0.004 | |
| Group * Neuroticism | |  | 0.001 | 0.22 | 0.83 | 0.001 | 0.01 | -0.01 | 0.01 | |
|  | | 0.02 |  |  |  |  |  |  |  | |
| Group | |  | 0.01 | 0.43 | 0.67 | 0.01 | 0.01 | -0.02 | 0.04 | |
| Imagination | |  | 0.004 | 1.16 | 0.25 | 0.005 | 0.004 | -0.003 | 0.01 | |
| Group * Imagination | |  | -0.01 | -1.48 | 0.14 | -0.01 | 0.01 | -0.02 | 0.002 | |
|  | | 0.000 |  |  |  |  |  |  |  | |
| Group | |  | 0.01 | 0.44 | 0.66 | 0.01 | 0.01 | -0.02 | 0.04 | |
| Mindfulness mindset | |  | -0.002 | -1.19 | 0.24 | -0.002 | 0.002 | -0.01 | 0.001 | |
| Group * Mindfulness mindset | |  | 0.0001 | 0.04 | 0.97 | 0.0001 | 0.003 | -0.005 | 0.01 | |
|  | | 0.01 |  |  |  |  |  |  |  | |
| Group | |  | 0.004 | 0.30 | 0.76 | 0.004 | 0.01 | -0.02 | 0.03 | |
| Trait mind-wandering | |  | -0.004 | -1.67 | 0.10 | -0.004 | 0.003 | -0.01 | 0.001 | |
| Group * Trait mind-wandering | |  | 0.005 | 1.34 | 0.18 | 0.005 | 0.003 | -0.003 | 0.01 | |
|  | | 0.003 |  |  |  |  |  |  |  | |
| Group | |  | 0.01 | 0.35 | 0.72 | 0.01 | 0.01 | -0.02 | 0.04 | |
| Positive affect | |  | 0.003 | 0.86 | 0.39 | 0.003 | 0.003 | -0.002 | 0.01 | |
| Group * Positive affect | |  | -0.003 | -0.52 | 0.54 | -0.003 | 0.003 | -0.01 | 0.004 | |
|  | | 0.004 |  |  |  |  |  |  |  | |
| Group | |  | 0.01 | 0.47 | 0.64 | 0.01 | 0.01 | -0.02 | 0.04 | |
| Negative affect | |  | 0.0003 | 0.004 | 0.93 | -0.004 | 0.004 | -0.01 | 0.01 | |
| Group * Negative affect | |  | -0.004 | 0.005 | 0.44 | -0.003 | 0.005 | -0.01 | 0.01 | |
|  | | 0.0001 |  |  |  |  |  |  |  | |
| Group | |  | 0.01 | 0.41 | 0.68 | 0.01 | 0.01 | -0.02 | 0.04 | |
| Trai anxiety | |  | 0.000 | 0.002 | 0.998 | -0.00 | 0.001 | -0.002 | 0.002 | |
| Group * Trait anxiety | |  | -0.002 | -0.12 | 0.90 | -0.002 | 0.001 | -0.003 | 0.003 | |

| Table S4: *Mind-wandering (self-incidence) predicted from mindfulness condition and Individual differences* | | | | | | | | | |
| --- | --- | --- | --- | --- | --- | --- | --- | --- | --- |
| Model | DR2 | | B | *t* | *p* | BootMean | BootSE | BootLLCI 95% | BootULCI 95% | |
|  | 0.02 | |  |  |  |  |  |  |  | |
| Group |  | | 0.03 | 0.75 | 0.46 | 0.03 | 0.04 | -0.05 | 0.10 | |
| Age |  | | -0.01 | -1.86 | 0.07 | -0.01 | 0.01 | -0.02 | -0.0004 | |
| Group * Age |  | | 0.01 | 1.50 | 0.14 | 0.01 | 0.01 | 0.01 | 0.03 | |
|  | 0.003 | |  |  |  |  |  |  |  | |
| Group |  | | 0.03 | 0.70 | 0.49 | 0.03 | 0.04 | -0.05 | 0.11 | |
| Gender |  | | -0.02 | -0.31 | 0.75 | -0.02 | 0.05 | -0.12 | 0.10 | |
| Group * Gender |  | | 0.05 | 0.64 | 0.52 | 0.05 | 0.07 | -0.10 | 0.19 | |
|  | 0.03 | |  |  |  |  |  |  |  | |
| Group |  | | 0.24 | 2.02 | 0.04 | 0.24 | 0.12 | 0.001 | 0.47 | |
| Previous mindfulness meditation experience |  | | 0.11 | 1.75 | 0.08 | 0.11 | 0.06 | -0.01 | 0.23 | |
| Group * Previous mindfulness meditation experience |  | | -0.16 | -1.90 | 0.06 | -0.17 | 0.08 | -0.31 | 0.004 | |
|  | 0.01 | |  |  |  |  |  |  |  | |
| Group |  | | 0.03 | 0.70 | 0.49 | 0.03 | 0.04 | -0.05 | 0.10 | |
| Observation |  | | 0.01 | 0.85 | 0.40 | 0.01 | 0.01 | -0.01 | 0.04 | |
| Group * Observation |  | | -0.02 | -1.32 | 0.19 | -0.02 | 0.02 | -0.06 | 0.01 | |
|  | 0.01 | |  |  |  |  |  |  |  | |
| Group |  | | 0.04 | 0.92 | 0.36 | 0.04 | 0.04 | -0.04 | 0.11 | |
| Description |  | | -0.02 | -1.47 | 0.14 | 0.01 | 0.01 | -0.04 | 0.004 | |
| Group * Description | |  | 0.02 | 1.13 | 0.26 | 0.01 | 0.01 | -0.01 | 0.05 | |
|  | | 0.0002 |  |  |  |  |  |  |  | |
| Group | |  | 0.03 | 0.70 | 0.48 | 0.03 | 0.04 | -0.05 | 0.11 | |
| Acting with Awareness | |  | -0.01 | 0.01 | 0.56 | -0.01 | 0.01 | -0.04 | 0.01 | |
| Group * Acting with Awareness | |  | 0.003 | 0.02 | 0.87 | 0.004 | 0.02 | -0.03 | 0.04 | |
|  | | 0.02 |  |  |  |  |  |  |  | |
| Group | |  | 0.05 | 1.33 | 0.19 | 0.05 | 0.04 | -0.02 | 0.13 | |
| Non-judgemental | |  | -0.03 | -2.75 | 0.01 | -0.03 | 0.01 | -0.06 | -0.01 | |
| Group * Non-judgemental | |  | 0.03 | 0.02 | 0.09 | 0.03 | 0.01 | -0.003 | 0.06 | |
|  | | 0.001 |  |  |  |  |  |  |  | |
| Group | |  | 0.03 | 0.65 | 0.52 | 0.03 | 0.04 | -0.05 | 0.10 | |
| Non-reactivity | |  | -0.01 | -0.43 | 0.67 | -0.01 | 0.01 | -0.03 | 0.02 | |
| Group * Non-reactivity | |  | -0.01 | -0.36 | 0.72 | -0.01 | 0.02 | -0.04 | 0.03 | |
|  | | 0.003 |  |  |  |  |  |  |  | |
| Group | |  | 0.04 | 1.04 | 0.30 | 0.04 | 0.04 | -0.03 | 0.12 | |
| Trait mindfulness total | |  | -0.01 | -1.77 | 0.08 | -0.01 | 0.01 | -0.02 | 0.0003 | |
| Group * Trait mindfulness total | |  | 0.004 | 0.66 | 0.51 | 0.005 | 0.01 | -0.01 | 0.02 | |
|  | | 0.003 |  |  |  |  |  |  |  | |
| Group | |  | 0.03 | 0.68 | 0.50 | 0.03 | 0.04 | -0.05 | 0.11 | |
| Extraversion | |  | 0.001 | 0.16 | 0.87 | 0.001 | 0.01 | -0.01 | 0.02 | |
| Group * Extraversion | |  | -0.01 | 0.61 | 0.54 | -0.01 | 0.01 | -0.03 | 0.01 | |
|  | | 0.001 |  |  |  |  |  |  |  | |
| Group | |  | 0.03 | 0.71 | 0.48 | 0.03 | 0.04 | -0.05 | 0.11 | |
| Agreeableness | |  | -0.003 | -0.27 | 0.79 | -0.003 | 0.01 | -0.23 | 0.02 | |
| Group * Agreeableness | |  | -0.01 | -0.35 | 0.73 | -0.006 | 0.02 | -0.04 | 0.02 | |
|  | | 0.03 |  |  |  |  |  |  |  | |
| Group | |  | 0.03 | 0.67 | 0.50 | 0.03 | 0.04 | -0.05 | 0.10 | |
| Conscientiousness | |  | 0.004 | 0.44 | 0.66 | 0.003 | 0.01 | -0.02 | 0.02 | |
| Group * Conscientiousness | |  | -0.02 | -2.08 | 0.04 | -0.02 | 0.01 | -0.05 | 0.002 | |
|  | | 0.001 |  |  |  |  |  |  |  | |
| Group | |  | 0.04 | 1.05 | 0.29 | 0.04 | 0.04 | -0.04 | 0.12 | |
| Neuroticism | |  | 0.01 | 1.26 | 0.21 | 0.01 | 0.01 | -0.01 | 0.03 | |
| Group * Neuroticism | |  | 0.004 | 0.34 | 0.74 | 0.004 | 0.01 | -0.02 | 0.03 | |
|  | | 0.001 |  |  |  |  |  |  |  | |
| Group | |  | 0.93 | 0.68 | 0.50 | 0.03 | 0.04 | -0.05 | 0.10 | |
| Imagination | |  | -0.02 | -1.90 | 0.06 | -0.02 | 0.01 | -0.04 | -0.001 | |
| Group * Imagination | |  | 0.004 | 0.26 | 0.79 | 0.004 | 0.01 | -0.02 | 0.03 | |
|  | | 0.001 |  |  |  |  |  |  |  | |
| Group | |  | 0.03 | 0.70 | 0.48 | 0.03 | 0.04 | -0.05 | 0.10 | |
| Mindfulness mindset | |  | 0.01 | 2.70 | 0.01 | 0.01 | 0.004 | 0.004 | 0.02 | |
| Group * Mindfulness mindset | |  | -0.03 | -0.43 | 0.67 | -0.003 | 0.01 | -0.01 | 0.01 | |
|  | | 0.01 |  |  |  |  |  |  |  | |
| Group | |  | 0.04 | 1.11 | 0.27 | 0.04 | 0.04 | -0.03 | 0.11 | |
| Trait mind-wandering | |  | 0.02 | 3.40 | 0.001 | 0.03 | 0.01 | 0.01 | 0.04 | |
| Group * Trait mind-wandering | |  | -0.01 | -0.97 | 0.34 | -0.01 | 0.01 | -0.03 | 0.01 | |
|  | | 0.000 |  |  |  |  |  |  |  | |
| Group | |  | 0.03 | 0.81 | 0.42 | 0.03 | 0.04 | -0.05 | 0.11 | |
| Positive affect | |  | -0.01 | -0.85 | 0.39 | -0.01 | 0.01 | -0.02 | 0.01 | |
| Group * Positive affect | |  | 0.001 | 0.05 | 0.96 | -0.00 | 0.01 | 0.01 | 0.02 | |
|  | | 0.01 |  |  |  |  |  |  |  | |
| Group | |  | 0.02 | 0.56 | 0.58 | 0.02 | 0.04 | -0.06 | 0.10 | |
| Negative affect | |  | 0.02 | 1.63 | 0.11 | 0.02 | 0.01 | 0.002 | 0.05 | |
| Group * Negative affect | |  | -0.02 | -1.39 | 0.17 | -0.02 | 0.01 | -0.05 | 0.001 | |
|  | | 0.002 |  |  |  |  |  |  |  | |
| Group | |  | 0.04 | 0.91 | 0.36 | 0.04 | 0.04 | -0.04 | 0.11 | |
| Trai anxiety | |  | 0.01 | 1.73 | 0.09 | 0.01 | 0.003 | -0.001 | 0.01 | |
| Group * Trait anxiety | |  | -0.002 | -0.55 | 0.58 | -0.002 | 0.004 | -0.01 | 0.01 | |

| Table S5: *Mind-wandering (reading performance) predicted from mindfulness condition and Individual differences* | | | | | | | | | |
| --- | --- | --- | --- | --- | --- | --- | --- | --- | --- |
| Model | DR2 | | B | *t* | *p* | BootMean | BootSE | BootLLCI 95% | BootULCI 95% | |
|  | 0.01 | |  |  |  |  |  |  |  | |
| Group |  | | -0.02 | -0.64 | 0.51 | -0.02 | 0.03 | -0.08 | 0.04 | |
| Age |  | | 0.003 | 0.52 | 0.61 | 0.003 | 0.01 | -0.01 | 0.02 | |
| Group * Age |  | | 0.01 | 1.11 | 0.27 | 0.01 | 0.01 | -0.01 | 0.02 | |
|  | 0.01 | |  |  |  |  |  |  |  | |
| Group |  | | -0.02 | -0.49 | 0.63 | -0.02 | 0.03 | -0.08 | 0.04 | |
| Gender |  | | 0.10 | 1.85 | 0.07 | 0.09 | 0.05 | -0.02 | 0.20 | |
| Group * Gender |  | | -0.08 | -1.20 | 0.24 | -0.08 | 0.06 | -0.21 | 0.05 | |
|  | 0.002 | |  |  |  |  |  |  |  | |
| Group |  | | 0.03 | 0.32 | 0.75 | 0.03 | 0.09 | -0.15 | 0.22 | |
| Previous mindfulness meditation experience |  | | -0.03 | -0.53 | 0.60 | -0.03 | 0.04 | -0.12 | 0.06 | |
| Group * Previous mindfulness meditation experience |  | | -0.04 | -0.54 | 0.59 | -0.04 | 0.06 | -0.16 | 0.08 | |
|  | 0.001 | |  |  |  |  |  |  |  | |
| Group |  | | -0.02 | -0.60 | 0.55 | -0.02 | 0.03 | -0.08 | 0.04 | |
| Observation |  | | 0.01 | 0.87 | 0.39 | 0.01 | 0.01 | -0.01 | 0.03 | |
| Group * Observation |  | | -0.005 | -0.32 | 0.75 | -0.005 | 0.02 | -0.03 | 0.03 | |
|  | 0.000 | |  |  |  |  |  |  |  | |
| Group |  | | -0.01 | -0.39 | 0.70 | -0.01 | 0.03 | -0.08 | 0.05 | |
| Description |  | | -0.01 | -0.65 | 0.51 | -0.01 | 0.01 | -0.02 | 0.01 | |
| Group * Description | |  | -0.0005 | -0.04 | 0.97 | -0.0005 | 0.01 | -0.02 | 0.02 | |
|  | | 0.002 |  |  |  |  |  |  |  | |
| Group | |  | -0.02 | -0.59 | 0.56 | -0.02 | 0.03 | -0.08 | 0.04 | |
| Acting with Awareness | |  | 0.001 | 0.13 | 0.90 | 0.001 | 0.01 | -0.02 | 0.02 | |
| Group * Acting with Awareness | |  | -0.01 | -0.57 | 0.57 | -0.01 | 0.01 | -0.04 | 0.02 | |
|  | | 0.01 |  |  |  |  |  |  |  | |
| Group | |  | -0.02 | -0.70 | 0.49 | -0.02 | 0.03 | -0.08 | 0.04 | |
| Non-judgemental | |  | 0.01 | 1.10 | 0.27 | 0.01 | 0.01 | -0.01 | 0.03 | |
| Group * Non-judgemental | |  | -0.02 | 1.44 | 0.15 | -0.02 | 0.01 | -0.04 | 0.01 | |
|  | | 0.003 |  |  |  |  |  |  |  | |
| Group | |  | -0.02 | -0.60 | 0.55 | -0.02 | 0.03 | -0.08 | 0.04 | |
| Non-reactivity | |  | 0.002 | 0.16 | 0.87 | 0.002 | 0.01 | -0.02 | 0.02 | |
| Group * Non-reactivity | |  | -0.01 | -0.68 | 0.50 | -0.01 | 0.01 | -0.04 | 0.02 | |
|  | | 0.01 |  |  |  |  |  |  |  | |
| Group | |  | -0.02 | -0.58 | 0.57 | -0.02 | 0.03 | -0.08 | 0.04 | |
| Trait mindfulness total | |  | 0.002 | 0.59 | 0.56 | 0.002 | 0.004 | -0.01 | 0.01 | |
| Group * Trait mindfulness total | |  | -0.01 | -1.16 | 0.25 | -0.01 | 0.01 | -0.02 | 0.005 | |
|  | | 0.0001 |  |  |  |  |  |  |  | |
| Group | |  | -0.02 | -0.50 | 0.62 | -0.02 | 0.03 | -0.08 | 0.05 | |
| Extraversion | |  | 0.01 | 1.04 | 0.30 | 0.01 | 0.01 | -0.01 | 0.02 | |
| Group * Extraversion | |  | -0.001 | -0.12 | 0.91 | -0.001 | 0.01 | -0.02 | 0.02 | |
|  | | 0.0003 |  |  |  |  |  |  |  | |
| Group | |  | -0.02 | -0.62 | 0.54 | -0.02 | 0.03 | -0.08 | 0.04 | |
| Agreeableness | |  | 0.01 | 1.14 | 0.26 | 0.01 | 0.01 | -0.003 | 0.02 | |
| Group * Agreeableness | |  | -0.002 | -0.20 | 0.84 | -0.003 | 0.01 | -0.03 | 0.02 | |
|  | | 0.001 |  |  |  |  |  |  |  | |
| Group | |  | -0.02 | -0.59 | 0.56 | -0.02 | 0.03 | -0.08 | 0.04 | |
| Conscientiousness | |  | 0.001 | 0.12 | 0.91 | 0.001 | 0.01 | -0.01 | 0.01 | |
| Group * Conscientiousness | |  | -0.003 | -0.29 | 0.77 | -0.003 | 0.01 | -0.02 | 0.02 | |
|  | | 0.001 |  |  |  |  |  |  |  | |
| Group | |  | -0.02 | -0.52 | 0.60 | -0.02 | 0.03 | -0.08 | 0.05 | |
| Neuroticism | |  | 0.003 | 0.39 | 0.69 | 0.003 | 0.01 | -0.01 | 0.02 | |
| Group * Neuroticism | |  | -0.003 | -0.30 | 0.77 | -0.003 | 0.01 | -0.02 | 0.02 | |
|  | | 0.001 |  |  |  |  |  |  |  | |
| Group | |  | -0.02 | -0.52 | 0.60 | -0.02 | 0.03 | -0.08 | 0.05 | |
| Imagination | |  | 0.003 | 0.39 | 0.69 | 0.003 | 0.01 | -0.01 | 0.02 | |
| Group * Imagination | |  | -0.003 | -0.30 | 0.77 | -0.003 | 0.01 | -0.02 | 0.02 | |
|  | | 0.0001 |  |  |  |  |  |  |  | |
| Group | |  | -0.02 | -0.57 | 0.57 | -0.02 | 0.03 | -0.08 | 0.04 | |
| Mindfulness mindset | |  | 0.01 | 1.17 | 0.25 | 0.01 | 0.01 | -0.01 | 0.02 | |
| Group * Mindfulness mindset | |  | -0.001 | -0.10 | 0.92 | -0.001 | 0.01 | -0.02 | 0.02 | |
|  | | 0.001 |  |  |  |  |  |  |  | |
| Group | |  | -0.02 | -0.58 | 0.56 | -0.02 | 0.03 | -0.08 | 0.04 | |
| Trait mind-wandering | |  | -0.01 | -1.39 | 0.17 | -0.01 | 0.003 | -0.01 | 0.001 | |
| Group * Trait mind-wandering | |  | 0.002 | 0.41 | 0.68 | 0.002 | 0.005 | -0.01 | 0.01 | |
|  | | 0.004 |  |  |  |  |  |  |  | |
| Group | |  | -0.02 | -0.77 | 0.44 | -0.02 | 0.03 | -0.09 | 0.04 | |
| Positive affect | |  | -0.01 | -1.74 | 0.08 | -0.01 | 0.01 | -0.02 | 0.003 | |
| Group * Positive affect | |  | 0.01 | 0.75 | 0.46 | 0.01 | 0.01 | -0.01 | 0.02 | |
|  | | 0.01 |  |  |  |  |  |  |  | |
| Group | |  | -0.02 | -0.54 | 0.59 | -0.02 | 0.03 | -0.08 | 0.05 | |
| Negative affect | |  | -0.01 | -1.17 | 0.24 | -0.01 | 0.01 | -0.02 | 0.004 | |
| Group * Negative affect | |  | 0.01 | 1.38 | 0.17 | 0.01 | 0.01 | -0.003 | 0.03 | |
|  | | 0.02 |  |  |  |  |  |  |  | |
| Group | |  | -0.01 | -0.39 | 0.70 | -0.01 | 0.03 | -0.07 | 0.05 | |
| Trai anxiety | |  | -0.02 | -2.11 | 0.04 | -0.02 | 0.01 | -0.03 | -0.004 | |
| Group * Trait anxiety | |  | 0.02 | 1.54 | 0.13 | 0.02 | 0.01 | -0.003 | 0.04 | |

| Table S6: *Cognitive Inhibition predicted from mindfulness condition and Individual differences* | | | | | | | | | |
| --- | --- | --- | --- | --- | --- | --- | --- | --- | --- |
| Model | DR2 | | B | *t* | *p* | BootMean | BootSE | BootLLCI 95% | BootULCI 95% | |
|  | 0.003 | |  |  |  |  |  |  |  | |
| Group |  | | 36.11 | 1.21 | 0.23 | 35.77 | 28.35 | -18.55 | 92.25 | |
| Age |  | | -0.48 | -0.10 | 0.92 | -0.50 | 3.45 | -7.05 | 6.85 | |
| Group * Age |  | | 3.96 | 0.68 | 0.50 | 3.12 | 4.92 | -7.75 | 11.84 | |
|  | 0.003 | |  |  |  |  |  |  |  | |
| Group |  | | 37.62 | 1.26 | 0.21 | 37.46 | 28.59 | -16.87 | 95.32 | |
| Gender |  | | 41.55 | 0.84 | 0.40 | 47.18 | 46.46 | -31.85 | 149.55 | |
| Group * Gender |  | | -43.88 | -0.70 | 0.49 | -48.41 | 79.50 | -206.74 | 112.10 | |
|  | 0.002 | |  |  |  |  |  |  |  | |
| Group |  | | -11.41 | -0.13 | 0.90 | -10.93 | 83.20 | -175.92 | 149.08 | |
| Previous mindfulness meditation experience |  | | -17.75 | -0.37 | 0.71 | -17.72 | 36.53 | -88.41 | 55.69 | |
| Group * Previous mindfulness meditation experience |  | | 35.27 | 0.56 | 0.57 | 35.08 | 61.43 | -78.70 | 163.66 | |
|  | 0.004 | |  |  |  |  |  |  |  | |
| Group |  | | 36.77 | 1.23 | 0.22 | 36.79 | 28.11 | -16.24 | 93.37 | |
| Observation |  | | -12.49 | -1.28 | 0.20 | -12.76 | 7.41 | -27.47 | 1.81 | |
| Group * Observation |  | | 10.87 | 0.78 | 0.43 | 11.19 | 11.28 | -10.86 | 32.95 | |
|  | 0.02 | |  |  |  |  |  |  |  | |
| Group |  | | 37.13 | 1.23 | 0.22 | 37.88 | 28.95 | -17.86 | 95.74 | |
| Description |  | | 8.04 | 0.94 | 0.35 | 7.83 | 5.80 | -3.83 | 18.98 | |
| Group * Description | |  | -20.93 | -1.77 | 0.08 | -20.81 | 10.50 | -41.90 | -0.57 | |
|  | | 0.001 |  |  |  |  |  |  |  | |
| Group | |  | 36.49 | 1.22 | 0.22 | 36.33 | 28.33 | -17.76 | 92.82 | |
| Acting with Awareness | |  | -1.05 | -0.11 | 0.91 | -1.06 | 7.12 | -15.29 | 12.88 | |
| Group * Acting with Awareness | |  | -4.90 | -0.38 | 0.71 | -5.02 | 10.58 | -26.55 | 14.95 | |
|  | | 0.01 |  |  |  |  |  |  |  | |
| Group | |  | 36.17 | 1.18 | 0.24 | 35.95 | 30.75 | -22.11 | 97.99 | |
| Non-judgemental | |  | 4.62 | 0.48 | 0.63 | 4.56 | 7.56 | -10.61 | 19.27 | |
| Group * Non-judgemental | |  | -10.52 | -0.89 | 0.38 | -10.32 | 12.68 | -36.52 | 12.91 | |
|  | | 0.004 |  |  |  |  |  |  |  | |
| Group | |  | 37.26 | 1.25 | 0.21 | 37.14 | 28.42 | -17.47 | 94.90 | |
| Non-reactivity | |  | -0.63 | -0.06 | 0.95 | -0.63 | 6.60 | -13.71 | 12.53 | |
| Group * Non-reactivity | |  | 10.49 | 0.79 | 0.43 | 10.02 | 14.27 | -16.53 | 39.62 | |
|  | | 0.002 |  |  |  |  |  |  |  | |
| Group | |  | 38.13 | 1.26 | 0.21 | 37.41 | 29.52 | -19.39 | 96.74 | |
| Trait mindfulness total | |  | 0.17 | 0.04 | 0.96 | 0.42 | 3.29 | -5.56 | 7.46 | |
| Group * Trait mindfulness total | |  | -2.53 | -0.53 | 0.60 | -2.88 | 4.17 | -11.69 | 4.79 | |
|  | | 0.001 |  |  |  |  |  |  |  | |
| Group | |  | 36.19 | 1.21 | 0.23 | 35.92 | 28.00 | -17.70 | 91.95 | |
| Extraversion | |  | -2.05 | -0.32 | 0.75 | -2.26 | 4.22 | -11.11 | 5.59 | |
| Group * Extraversion | |  | 3.77 | 0.44 | 0.66 | 4.07 | 8.65 | -13.66 | 19.83 | |
|  | | 0.01 |  |  |  |  |  |  |  | |
| Group | |  | 35.69 | 1.20 | 0.23 | 35.69 | 28.03 | -17.83 | 91.36 | |
| Agreeableness | |  | 10.61 | 1.46 | 0.15 | 10.67 | 4.23 | 2.37 | 19.12 | |
| Group * Agreeableness | |  | -9.94 | -0.91 | 0.37 | -10.29 | 10.88 | -33.31 | 9.88 | |
|  | | 0.0004 |  |  |  |  |  |  |  | |
| Group | |  | 36.49 | 1.22 | 0.23 | 36.56 | 28.15 | -16.86 | 93.27 | |
| Conscientiousness | |  | 1.23 | 0.20 | 0.84 | 1.23 | 4.48 | -7.63 | 10.16 | |
| Group * Conscientiousness | |  | -2.03 | -0.24 | 0.81 | -2.11 | 7.53 | -17.31 | 12.35 | |
|  | | 0.01 |  |  |  |  |  |  |  | |
| Group | |  | 34.06 | 1.13 | 0.26 | 34.56 | 29.23 | -20.93 | 92.64 | |
| Neuroticism | |  | -7.05 | -0.91 | 0.36 | -6.99 | 5.73 | -18.29 | 4.10 | |
| Group * Neuroticism | |  | 10.93 | 1.15 | 0.25 | 10.82 | 8.08 | -5.01 | 27.11 | |
|  | | 0.004 |  |  |  |  |  |  |  | |
| Group | |  | 36.60 | 1.22 | 0.22 | 36.72 | 28.08 | -16.99 | 92.84 | |
| Imagination | |  | 5.82 | 0.76 | 0.45 | 5.41 | 5.78 | -6.95 | 16.10 | |
| Group * Imagination | |  | -7.80 | -0.74 | 0.46 | -7.58 | 11.65 | -32.90 | 13.22 | |
|  | | 0.002 |  |  |  |  |  |  |  | |
| Group | |  | 36.68 | 1.23 | 0.22 | 36.61 | 27.95 | -17.57 | 92.78 | |
| Mindfulness mindset | |  | -4.41 | -1.24 | 0.22 | -4.55 | 2.72 | -10.25 | 0.62 | |
| Group * Mindfulness mindset | |  | 2.39 | 0.50 | 0.62 | 2.48 | 4.40 | -6.12 | 11.20 | |
|  | | 0.001 |  |  |  |  |  |  |  | |
| Group | |  | 33.05 | 1.11 | 0.27 | 32.96 | 28.06 | -20.82 | 89.32 | |
| Trait mind-wandering | |  | -5.74 | -1.04 | 0.30 | -5.67 | 3.67 | -12.90 | 1.72 | |
| Group * Trait mind-wandering | |  | 2.26 | 0.33 | 0.74 | 1.99 | 6.10 | -10.28 | 13.69 | |
|  | | 0.001 |  |  |  |  |  |  |  | |
| Group | |  | 35.13 | 1.17 | 0.24 | 34.86 | 28.25 | -18.91 | 91.29 | |
| Positive affect | |  | 0.48 | 0.08 | 0.94 | 0.36 | 4.37 | -8.57 | 8.72 | |
| Group * Positive affect | |  | 3.60 | 0.44 | 0.66 | 3.83 | 6.81 | -9.54 | 17.23 | |
|  | | 0.05 |  |  |  |  |  |  |  | |
| Group | |  | 35.66 | 1.23 | 0.22 | 36.44 | 26.59 | -14.59 | 89.15 | |
| Negative affect | |  | -9.61 | -1.30 | 0.20 | -10.16 | 5.28 | -22.38 | -1.03 | |
| Group * Negative affect | |  | 25.77 | 2.82 | 0.01 | 26.55 | 10.26 | 8.89 | 48.81 | |
|  | | 0.01 |  |  |  |  |  |  |  | |
| Group | |  | 34.10 | 1.14 | 0.26 | 34.67 | 28.87 | -20.43 | 92.83 | |
| Trai anxiety | |  | -2.60 | -1.04 | 0.30 | -2.59 | 1.79 | -6.19 | 0.89 | |
| Group * Trait anxiety | |  | 3.02 | 0.98 | 0.33 | 3.04 | 2.44 | -1.60 | 8.05 | |

| Table S7: *Cognitive flexibility predicted from mindfulness condition and Individual differences* | | | | | | | | | |
| --- | --- | --- | --- | --- | --- | --- | --- | --- | --- |
| Model | DR2 | | B | *t* | *p* | BootMean | BootSE | BootLLCI 95% | BootULCI 95% | |
|  | 0.0002 | |  |  |  |  |  |  |  | |
| Group |  | | 49.22 | 1.16 | 0.25 | 49.17 | 42.09 | -34.36 | 131.97 | |
| Age |  | | 1.43 | 0.22 | 0.83 | 1.88 | 6.56 | -9.64 | 16.01 | |
| Group * Age |  | | -1.54 | -0.19 | 0.85 | -1.28 | 8.30 | -17.80 | 15.30 | |
|  | 0.001 | |  |  |  |  |  |  |  | |
| Group |  | | 49.95 | 1.17 | 0.24 | 49.79 | 42.14 | -33.85 | 132.50 | |
| Gender |  | | 21.07 | 0.30 | 0.76 | 25.05 | 57.41 | -78.98 | 149.23 | |
| Group * Gender |  | | -26.28 | -0.29 | 0.77 | -25.73 | 97.30 | -205.44 | 178.02 | |
|  | 0.0003 | |  |  |  |  |  |  |  | |
| Group |  | | 27.27 | 0.21 | 0.83 | 26.91 | 125.99 | 219.09 | 273.73 | |
| Previous mindfulness meditation experience |  | | -64.70 | -0.96 | 0.34 | -65.46 | 62.78 | -189.59 | 58.55 | |
| Group * Previous mindfulness meditation experience |  | | 16.81 | 0.19 | 0.85 | 17.03 | 86.56 | -155.15 | 186.55 | |
|  | 0.001 | |  |  |  |  |  |  |  | |
| Group |  | | 49.61 | 1.17 | 0.25 | 49.53 | 41.72 | -32.31 | 132.31 | |
| Observation |  | | -6.34 | -0.45 | 0.65 | -6.48 | 10.89 | -28.87 | 14.49 | |
| Group * Observation |  | | 5.25 | 0.27 | 0.79 | 5.54 | 19.60 | -32.10 | 44.02 | |
|  | 0.001 | |  |  |  |  |  |  |  | |
| Group |  | | 47.80 | 1.10 | 0.27 | 48.07 | 44.50 | -38.95 | 136.43 | |
| Description |  | | 4.78 | 0.39 | 0.70 | 4.57 | 11.12 | -17.64 | 26.10 | |
| Group * Description | |  | -7.51 | -0.44 | 0.66 | -7.18 | 16.88 | -40.25 | 26.06 | |
|  | | 0.001 |  |  |  |  |  |  |  | |
| Group | |  | 49.68 | 1.17 | 0.24 | 49.10 | 41.56 | -33.25 | 130.18 | |
| Acting with Awareness | |  | -6.01 | -0.44 | 0.66 | -5.74 | 10.88 | -26.61 | 15.99 | |
| Group * Acting with Awareness | |  | -8.34 | -0.46 | 0.65 | -8.87 | 17.65 | -44.10 | 24.75 | |
|  | | 0.01 |  |  |  |  |  |  |  | |
| Group | |  | 55.10 | 1.27 | 0.21 | 53.74 | 42.57 | -30.25 | 137.13 | |
| Non-judgemental | |  | -11.89 | -0.87 | 0.38 | -11.99 | 13.77 | -39.41 | 14.90 | |
| Group * Non-judgemental | |  | 15.98 | 0.95 | 0.34 | 15.93 | 16.85 | -16.74 | 48.92 | |
|  | | 0.001 |  |  |  |  |  |  |  | |
| Group | |  | 48.03 | 1.13 | 0.26 | 48.83 | 41.73 | -33.99 | 130.57 | |
| Non-reactivity | |  | -9.35 | -0.63 | 0.53 | -9.79 | 12.79 | -36.00 | 15.23 | |
| Group * Non-reactivity | |  | 7.87 | 0.41 | 0.68 | 8.35 | 18.05 | -27.62 | 44.29 | |
|  | | 0.001 |  |  |  |  |  |  |  | |
| Group | |  | 55.24 | 1.29 | 0.20 | 55.07 | 42.20 | -27.18 | 137.58 | |
| Trait mindfulness total | |  | -3.99 | -0.74 | 0.46 | -4.06 | 4.29 | -12.80 | 4.15 | |
| Group * Trait mindfulness total | |  | 2.33 | 0.34 | 0.73 | 2.51 | 5.71 | -8.50 | 14.19 | |
|  | | 0.02 |  |  |  |  |  |  |  | |
| Group | |  | 52.11 | 1.25 | 0.21 | 51.98 | 40.94 | -28.26 | 132.42 | |
| Extraversion | |  | -3.11 | -0.35 | 0.72 | -2.89 | 9.45 | -21.84 | 15.27 | |
| Group * Extraversion | |  | 21.57 | 1.82 | 0.07 | 21.36 | 12.22 | -2.72 | 45.85 | |
|  | | 0.0001 |  |  |  |  |  |  |  | |
| Group | |  | 48.11 | 1.14 | 0.26 | 46.66 | 41.36 | -35.73 | 127.11 | |
| Agreeableness | |  | 11.35 | 1.10 | 0.27 | 10.89 | 9.16 | -8.98 | 27.25 | |
| Group * Agreeableness | |  | 1.49 | 0.10 | 0.92 | 2.41 | 15.37 | -25.61 | 34.45 | |
|  | | 0.000 |  |  |  |  |  |  |  | |
| Group | |  | 45.72 | 1.10 | 0.27 | 44.07 | 40.82 | -37.07 | 124.32 | |
| Conscientiousness | |  | -15.21 | -1.78 | 0.08 | -15.54 | 8.27 | -32.89 | -0.20 | |
| Group * Conscientiousness | |  | 0.56 | 0.05 | 0.96 | 0.95 | 11.90 | -22.15 | 24.85 | |
|  | | 0.0002 |  |  |  |  |  |  |  | |
| Group | |  | 47.59 | 1.11 | 0.27 | 47.58 | 42.56 | -36.59 | 131.96 | |
| Neuroticism | |  | -1.04 | -0.09 | 0.93 | -0.89 | 9.31 | -18.56 | 17.72 | |
| Group * Neuroticism | |  | -2.12 | -0.16 | 0.88 | -2.06 | 12.00 | -25.61 | 21.61 | |
|  | | 0.003 |  |  |  |  |  |  |  | |
| Group | |  | 49.63 | 1.17 | 0.24 | 49.44 | 41.5 | -33.05 | 131.51 | |
| Imagination | |  | -1.29 | -0.12 | 0.91 | -1.08 | 9.32 | -19.07 | 17.69 | |
| Group * Imagination | |  | 9.40 | 0.63 | 0.53 | 8.69 | 13.76 | -18.69 | 35.38 | |
|  | | 0.002 |  |  |  |  |  |  |  | |
| Group | |  | 49.72 | 1.18 | 0.24 | 48.64 | 41.78 | -33.91 | 129.94 | |
| Mindfulness mindset | |  | -2.09 | -0.41 | 0.68 | -1.85 | 4.85 | -10.42 | 8.61 | |
| Group * Mindfulness mindset | |  | -3.74 | -0.55 | 0.59 | -4.23 | 6.59 | -17.85 | 7.89 | |
|  | | 0.001 |  |  |  |  |  |  |  | |
| Group | |  | 55.45 | 1.32 | 0.19 | 56.59 | 40.78 | -24.06 | 137.11 | |
| Trait mind-wandering | |  | 6.82 | 0.88 | 0.38 | 7.13 | 8.24 | -8.74 | 23.95 | |
| Group * Trait mind-wandering | |  | 4.31 | 0.44 | 0.66 | 4.05 | 10.26 | -16.49 | 24.08 | |
|  | | 0.001 |  |  |  |  |  |  |  | |
| Group | |  | 53.48 | 1.26 | 0.21 | 53.33 | 41.52 | -28.42 | 135.34 | |
| Positive affect | |  | -7.89 | -0.90 | 0.37 | -8.21 | 8.63 | -26.75 | 7.01 | |
| Group * Positive affect | |  | 3.60 | 0.31 | 0.76 | 4.08 | 12.66 | -20.02 | 29.60 | |
|  | | 0.01 |  |  |  |  |  |  |  | |
| Group | |  | 46.69 | 1.10 | 0.27 | 47.86 | 41.47 | -34.11 | 129.27 | |
| Negative affect | |  | 10.79 | 1.00 | 0.32 | 9.93 | 10.89 | -14.19 | 30.91 | |
| Group * Negative affect | |  | -15.10 | -1.12 | 0.26 | -14.36 | 13.93 | -41.21 | 14.31 | |
|  | | 0.01 |  |  |  |  |  |  |  | |
| Group | |  | 48.17 | 1.14 | 0.26 | 47.92 | 41.95 | -34.31 | 130.99 | |
| Trai anxiety | |  | 1.28 | 0.36 | 0.72 | 1.39 | 2.79 | -3.90 | 7.07 | |
| Group * Trait anxiety | |  | -4.76 | -1.09 | 0.28 | 4.88 | 3.53 | -11.97 | 1.98 | |

Part 2

**The Task-Switching Task (TST)**:

All the stimuli are presented on a 2*2 grid with a black background. This task contains three different blocks: the letter block, the number block and the mixed block. The first three trials of each block are practice trials. In the letter block, a letter-number pair is presented in the bottom quadrants, and respondents are asked to press ‘*B*’/‘*N*’ for an odd/even number and inhibit responses to letters. In the number block, the letter-number pair is presented in the top quadrants, and respondents are asked to press ‘*B*’/‘*N*’ for a consonant/vowel and inhibit response to numbers. In the mixed block, participants respond to either the letter or the number according to the previous rules, but they have to pay attention to the position where the number/letter appeared, switching between the two rules: when a letter and number appear at the top of the grid, such as 'G6' or 'A3', respondents are required to press '*N*' for consonant letters like 'G' and '*B*' for vowel letters such as 'A', conversely, when a letter and number are displayed at the bottom of the grid, for instance 'A8' or 'M7', respondents should press '*N'* for odd numbers like '8' and '*B*' for even numbers such as '7' (see Fig. 2). Reaction time, and responses (correct, incorrect or too slow) to stimuli are recorded. Response times below 100 ms and above 2000 ms were excluded from the analysis (Schmidt & Liefooghe, 2016). Incorrect responses were also excluded. The switch cost, which is an index of cognitive flexibility, was calculated by the difference between the mean reaction time (RT) of switch trials and the mean RT of non-switch trials in the mixed block. A shorter switch cost indicates better cognitive flexibility. We also calculated a variable for inhibitory control based on the RT of the correct response time in the number block (Stein et al., 2017). A shorter RT indicated better cognitive inhibition.

**Fig. S1** Task-switching task


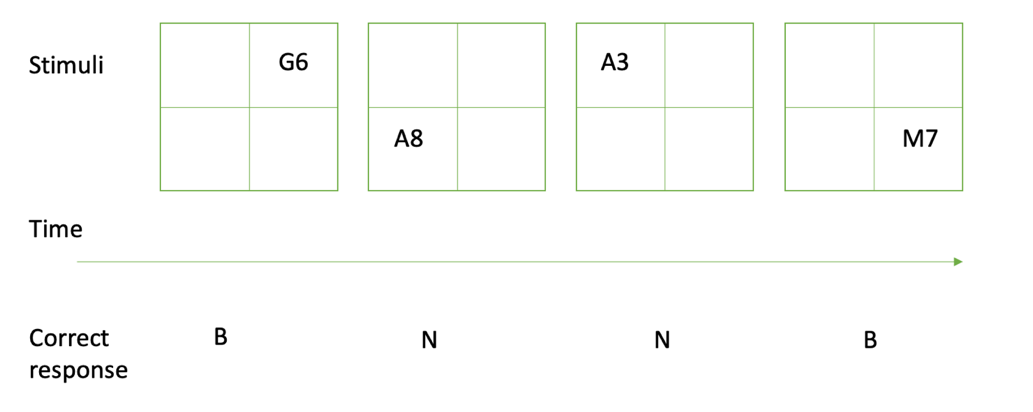


**The 2-back (letter) task:**

Letters A,B,C,D,E,H,I,K,L,M,O,P,R,S, and T are used in this task (Jaeggi et al., 2010; Stoet, 2010, 2017). This task has three blocks, each with 25 trials. The stimuli are presented on the screen one-by-one, 500 milliseconds followed by 2500 milliseconds with a black screen. Participants are to decide if the current stimulus is the same as the one presented two trials before within three seconds. False alarm, number of hits, correct rejections, misses and reaction time are recorded. Three indices from the 2-back task were utilized to measure working memory. Response times below 100 ms and above 3000 ms were excluded from the analysis (Wild-Wall et al., 2011). The remaining data were used to calculate reaction time on correct trials (RT), discrimination index (d'), and response accuracy. Shorter RT, higher d' and greater accuracy correspond to better working memory performance. The discrimination index, d', is derived from the difference between the Z-transformed hit rates (HR) and the Z-transformed false alarm rates (FAR), calculated as d' = Z(HR) - Z(FAR). If all responses are correct (HR=1, FAR=0), the adjusted HR becomes 1 - 1/(2 × matching trials), and the adjusted FAR is 1/(2 × non-matching trials) (Haatveit et al., 2010).

**Fig. S2** 2-back task


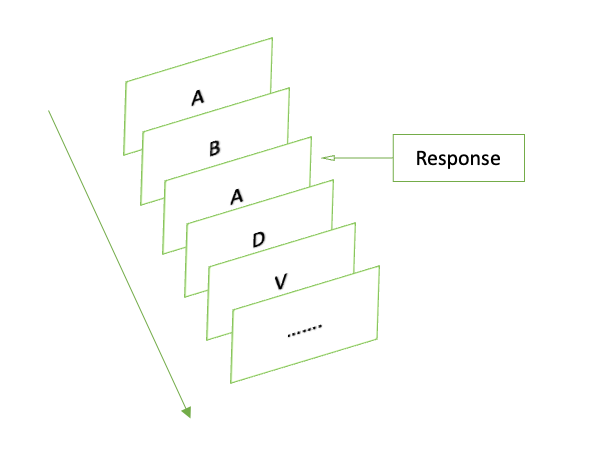


**The reading task:**

Mind-wandering was measured by a reading task incorporating probe-caught questions during and reading comprehension questions following reading segments. Participants were instructed to read four passages (1350 words) from the Nelson–Denny Reading Comprehension test, version E (Brown, Bennett, & Hanna, 1981, as cited in Feng et al., 2013). Passage 1 has 12 sentences with 194 words; passage 2 has 29 sentences with 626 words; passage 3 has 13 sentences with 211 words; passage 4 has 10 sentences with 252 words. Participants were periodically interrupted during reading to answer a probe-caught question with ‘yes’ or ‘no’: “Were you mind wandering when you read the previous sentence?”. Additionally, after each passage, they were asked to respond to two reading comprehension questions based on the reading context. Each passage included two probe-caught questions and two multiple-choice (with five options) comprehension questions with one correct answer, except for the second passage which included three probe-caught questions due to its length. In total, this task included 9 probe-caught questions and 8 comprehension questions. The self-reported incidence rate of mind-wandering during the reading task was calculated. Additionally, the accuracy of answers to reading comprehension questions was also used aproxy of mind-wandering. Higher self-reported incidence indicates more frequent mind-wandering, while a higher correct answer rate suggests better comprehension and likely less mind-wandering (Feng et al., 2013).
